# Supplementary material for: Integrated platform with a combination of online digestion and 18O labeling for proteome quantification via an immobilized trypsin microreactor
Source: Royal Society of Chemistry journal article supplement (doi:10.1039/c5an00887e), 2015-01-01
Supplement: c5an00887e1.pdf [file c5an00887e1.pdf]

**Supplementary Information for**  
**Integrated Platform with Combination of Online Digestion and  $^{18}\text{O}$  Labeling for**  
**Proteome Quantification via Immobilized Trypsin Microreactor**

**Shen Zhang, Huiming Yuan, Baofeng Zhao, Yuan Zhou, Hao Jiang, Lihua**

**Zhang, Zhen Liang, Yukui Zhang**

**Figure S1.** Evaluation of the back-exchange of  $^{18}\text{O}$  labeling. After labeling using IMER, samples were analyzed immediately (A) and again after 1 week at room temperature (B) by MALDI-TOF-MS. The amino acid sequences of peptide A, B depicted in all figure are YLYEIAR and LGEYGFQNALIVR.

**Figure S2.** The LC-MS/MS spectrum of the platform.

(A) The TIC MS spectrum of three LC-MS/MS analysis of the yeast sample analyzed by the platform

(B) A typical MS spectrum of yeast sample

**Figure S3.** Evaluation of the quantitative accuracy and reproducibility of the integrated platform by 100 ng  $^{18}\text{O}$  and  $^{16}\text{O}$  online labeled yeast sample at a mixing ratio of 1:1

(C) The observed  $\log_2$  (H/L) ratios of proteins quantified in all of three technical replicates.

(D) The RSD distribution of the ratios of proteins quantified in all three technical replicates.

**Figure S4.** Box plots showing the ratios measured at mixing ratios of 1:1, 1:5 and 1:10.

**Figure S5.** The  $\log_2$  (H/L) ratios distribution of peptides with or without miss-cleavage sites from the first run of 1:1 mixed yeast sample.

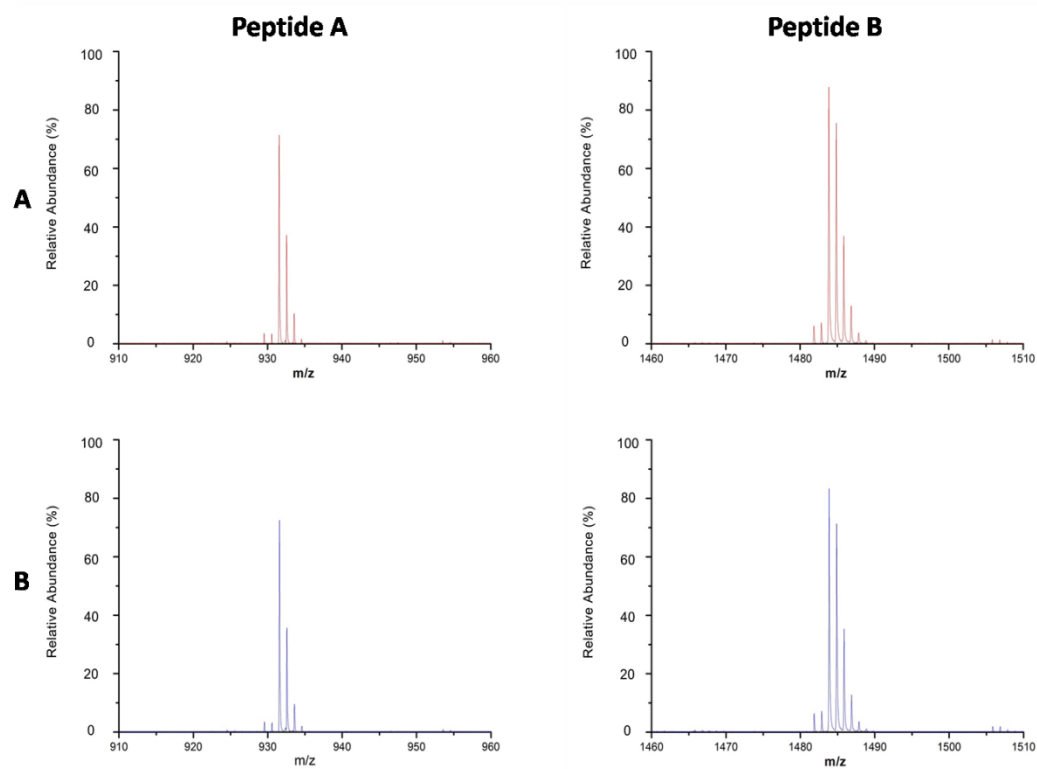

**Figure S1.** Evaluation of the back-exchange of  $^{18}\text{O}$  labeling. After labeling using IMER, samples were analyzed immediately (A) and again after 1 week at room temperature (B) by MALDI-TOF-MS. The amino acid sequences of peptide A, B depicted in all figure are YLYEIAR and LGEYGFQNALIVR.



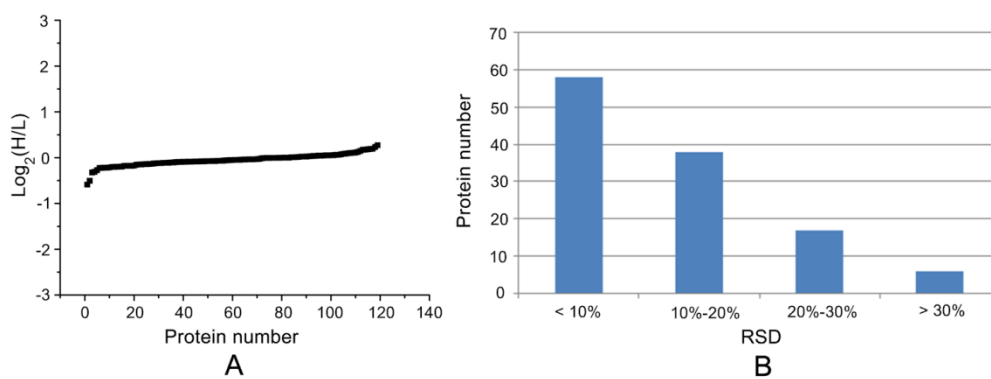

**Figure S3.** Evaluation of the quantitative accuracy and reproducibility of the integrated platform by 100 ng  $^{18}\text{O}$  and  $^{16}\text{O}$  online labeled yeast sample at a mixing ratio of 1:1

(A) The observed  $\log_2(H/L)$  ratios of proteins quantified in all of three technical replicates.

(B) The RSD distribution of the ratios of proteins quantified in all three technical replicates.

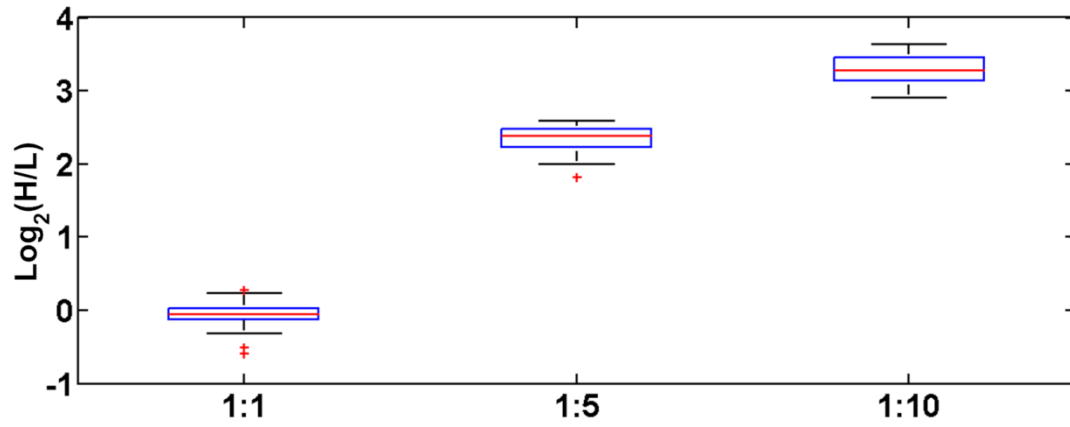

**Figure S4.** Box plots showing the ratios measured (box and whiskers) at mixing ratios of 1:1, 1:5 and 1:10.

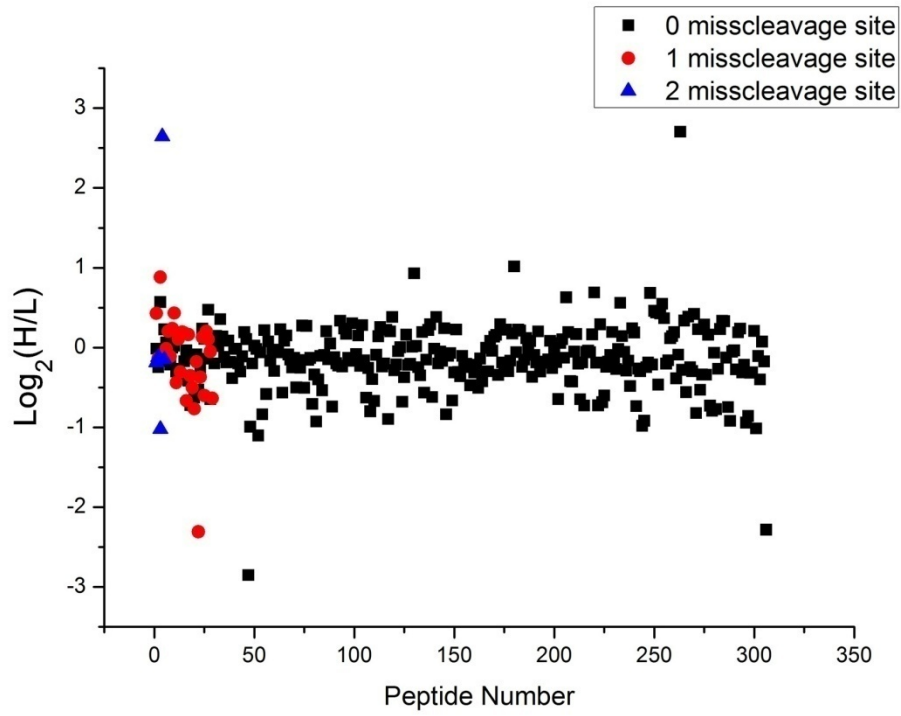

**Figure S5.** The  $\log_2(H/L)$  ratios distribution of peptides with or without misscleavage sites from the first run of 1:1 mixed yeast sample.

**Table S1.** Differentially expressed proteins in Hca-F and Hca-P cell lines.

| <b>IPI</b>  | <b>Protein Name</b>                             | <b>Ratio (Hca-F/Hca-P)</b> |
|-------------|-------------------------------------------------|----------------------------|
| IPI00124700 | Transferrin receptor protein 1                  | 2.47 ± 0.13                |
| IPI00123639 | Calreticulin                                    | 2.44 ± 0.04                |
| IPI00123281 | Leucine-rich repeat-containing protein 59       | 2.27 ± 0.02                |
| IPI00129519 | Brain acid soluble protein 1                    | 2.18 ± 0.06                |
| IPI00126072 | Synaptic vesicle membrane protein VAT-1 homolog | 2.16 ± 0.03                |
| IPI00279079 | Fibrinogen beta chain                           | 0.41 ± 0.02                |
| IPI00553798 | Ahnak protein                                   | 0.39 ± 0.01                |
| IPI00469114 | Hemoglobin subunit alpha                        | 0.33 ± 0.03                |
| IPI00885793 | Fibrinogen A-alpha-chain                        | 0.27 ± 0.01                |
| IPI00122312 | Fibrinogen gamma chain                          | 0.21 ± 0.02                |
